# Supplementary material for: Maternal Bacterial Infection During Pregnancy and Offspring Risk of Psychotic Disorders: Variation by Severity of Infection and Offspring Sex
Source: Atypon-hosted journal article supplement (doi:10.1176/appi.ajp.2019.18101206), 2019-10-04
Supplement: ajp_18101206_correction01.pdf [file ajp_18101206_correction01.pdf]

## **Correction to Lee et al.**

When the article “Maternal Bacterial Infection During Pregnancy and Offspring Risk of Psychotic Disorders: Variation by Severity of Infection and Offspring Sex,” by Younga H. Lee et al. (doi: 10.1176/appi.ajp.2019.18101206) was published online on October 4, 2019, and in the January 2020 issue, the Ns in Table 4 were mistranscribed. The male and female offspring with psychosis should have been listed, respectively, as 31 and 12 for “any bacterial infection,” 25 and 11 for “localized bacterial infection,” and 8 and 1 for “multisystemic bacterial infection.” The Ns were corrected in the online edition of the article on December 15, 2020.
