# Supplementary material for: Maternal Bacterial Infection During Pregnancy and Offspring Risk of Psychotic Disorders: Variation by Severity of Infection and Offspring Sex
Source: Atypon-hosted journal article supplement (doi:10.1176/appi.ajp.2019.18101206), 2019-10-04
Supplement: appi.ajp.2019.18101206.ds001.pdf [file appi.ajp.2019.18101206.ds001.pdf]

**TABLE S1.** Sensitivity analysis for the hypothesized associations using confirmed instances of bacterial infection.

| Exposure Type                     | Offspring Psychosis (N) | Unadjusted       |         |        | Adjusted           |         |       |
|-----------------------------------|-------------------------|------------------|---------|--------|--------------------|---------|-------|
|                                   |                         | Odds Ratio       | 95% CI  | p      | Odds Ratio         | 95% CI  | p     |
| Any bacterial infection           | 26                      | 2.4              | 1.5-3.7 | <0.001 | 2.1 <sup>a</sup>   | 1.3-3.2 | 0.002 |
| Localized bacterial infection     | 19                      | 1.9              | 1.1-3.1 | 0.016  | 1.7 <sup>a</sup>   | 1.0-2.8 | 0.056 |
| Multisystemic bacterial infection | 9                       | 3.6 <sup>b</sup> | 1.6-7.2 | 0.003  | 3.3 <sup>b,c</sup> | 1.4-6.5 | 0.006 |

\* Number of psychotic cases exposed to a given type of bacterial infection during pregnancy.

<sup>a</sup> Odds ratios were adjusted for maternal education, socioeconomic status, maternal race/ethnicity, maternal neurologic/psychiatric conditions during pregnancy, study site, season and year of birth, offspring sex, parental history of mental illness, participation in the final follow-up assessment of the Collaborative Perinatal Project study, and viral infection during pregnancy through multivariate logistic regression models.

<sup>b</sup> We fitted exact logistic regression for multisystemic bacterial infection and estimated exact p-values.

<sup>c</sup> Odds ratio was adjusted for viral infection during pregnancy, parental history of mental illness, and maternal race/ethnicity.

**TABLE S2.** Sensitivity analyses for the stratified analyses by offspring sex using confirmed instances of bacterial infection.

| Exposure Type and Offspring Sex   | Offspring Psychosis (N) | Unadjusted       |          |       | Adjusted           |          |       |
|-----------------------------------|-------------------------|------------------|----------|-------|--------------------|----------|-------|
|                                   |                         | Odds Ratio       | 95% CI   | p     | Odds Ratio         | 95% CI   | p     |
| Any bacterial infection           |                         |                  |          |       |                    |          |       |
| Male                              | 20                      | 3.2              | 1.8-5.7  | 0.037 | 2.9 <sup>a</sup>   | 1.6-5.2  | 0.034 |
| Female                            | 6                       | 1.1              | 0.4-2.6  |       | 0.9 <sup>a</sup>   | 0.4-2.3  |       |
| Localized bacterial infection     |                         |                  |          |       |                    |          |       |
| Male                              | 14                      | 2.3              | 1.2-4.3  | 0.18  | 2.0 <sup>a</sup>   | 1.1-3.9  | 0.18  |
| Female                            | 8                       | 1.0              | 0.4-2.7  |       | 0.9 <sup>a</sup>   | 0.4-2.4  |       |
| Multisystemic bacterial infection |                         |                  |          |       |                    |          |       |
| Male                              | 8                       | 6.1 <sup>b</sup> | 2.5-13.1 |       | 5.4 <sup>b,c</sup> | 2.2-11.8 |       |
| Female                            | 1                       |                  |          |       |                    |          |       |

\* Number of psychotic cases exposed to a given type of bacterial infection during pregnancy.

<sup>a</sup> Odds ratios were adjusted for maternal neurologic/psychiatric conditions during pregnancy, maternal education, socioeconomic index, maternal race/ethnicity, study site, season and year of birth, parental history of mental illness, participation in the final follow-up assessment of the Collaborative Perinatal Project study, and viral infection during pregnancy through multivariate logistic regression models.

<sup>b</sup> We fitted exact logistic regression for male participants given the limited number of female case subjects exposed to multisystemic bacterial infection. Accordingly, the interaction term was not tested for statistical significance for this type of bacterial infection.

<sup>c</sup> Odds ratio was adjusted for viral infection during pregnancy, parental history of mental illness, and maternal race/ethnicity.

**TABLE S3.** Sensitivity analyses for the stratified analyses by parental mental illness (PMI) using confirmed instances of bacterial infection.

| Exposure Type and Parental History of Mental Illness | Offspring Psychoses (N) | Unadjusted       |          |      | Adjusted           |          |      |
|------------------------------------------------------|-------------------------|------------------|----------|------|--------------------|----------|------|
|                                                      |                         | Odds Ratio       | 95% CI   | p    | Odds Ratio         | 95% CI   | p    |
| Any bacterial infection                              |                         |                  |          |      |                    |          |      |
| Present                                              | 7                       | 2.5              | 1.0-6.2  | 0.70 | 2.2 <sup>a</sup>   | 0.9-5.6  | 0.75 |
| Not present                                          | 18                      | 2.0              | 1.1-3.4  |      | 1.9 <sup>a</sup>   | 1.1-3.2  |      |
| Localized bacterial infection                        |                         |                  |          |      |                    |          |      |
| Present                                              | 5                       | 1.8 <sup>b</sup> | 0.7-5.1  | 0.79 | 1.7 <sup>b,c</sup> | 0.5-4.6  | 0.86 |
| Not present                                          | 13                      | 1.6 <sup>b</sup> | 0.8-2.9  |      | 1.5 <sup>b,c</sup> | 0.8-2.8  |      |
| Multisystemic bacterial infection                    |                         |                  |          |      |                    |          |      |
| Present                                              | 4                       | 5.0 <sup>b</sup> | 1.2-15.2 | 0.41 | 5.3 <sup>b,c</sup> | 1.3-16.4 | 0.36 |
| Not present                                          | 5                       | 2.7 <sup>b</sup> | 0.9-6.7  |      | 2.7 <sup>b,c</sup> | 0.8-6.6  |      |

\* Number of psychotic cases exposed to a given type of bacterial infection during pregnancy.

<sup>a</sup> Odds ratios were adjusted for maternal neurologic/psychiatric conditions during pregnancy, maternal education, socioeconomic index, maternal race/ethnicity, study site, season and year of birth, offspring sex, participation in the final follow-up assessment of the Collaborative Perinatal Project study, and viral infection during pregnancy through multivariate logistic regression models.

<sup>b</sup> We fitted exact logistic regression for multisystemic bacterial infection and estimated exact p-values.

<sup>c</sup> Odds ratio was adjusted for viral infection during pregnancy, parental history of mental illness, and maternal race/ethnicity.
